# Supplementary material for: Wound Infection of Snakebite from Venomous Protobothrops mucrosquamatus, Viridovipera stejnegeri and Naja atra in Taiwan: Validation of BITE and Cobra BITE Scoring Systems and their Bacteriological Differences in Wound Cultures
Source: MDPI journal article supplement (doi:10.3390/toxins15010078), 2023-01-15
Supplement: s1 [file s1]

# Supplementary Materials: Wound Infection of Snakebite from Venomous *Protobothrops mucrosquamatus*, *Viridovipera stejnegeri* and *Naja atra* in Taiwan: Validation of BITE and Cobra BITE Scoring Systems and their Bacteriological Differences in Wound Cultures

Heng Yeh, Shi-Ying Gao and Chih-Chuan Lin

**Table S1.** The characteristics of the validation cohort of the BITE study.

|                                        | Wound infection | No Wound Infection | <i>p</i> -value |
|----------------------------------------|-----------------|--------------------|-----------------|
|                                        | N=35            | N=60               |                 |
| <b>Demographic characteristics</b>     |                 |                    |                 |
| Age                                    | 55.71(17.42)    | 61.00(14.97)       | 0.12            |
| Male*                                  | 24(68.57)       | 40(66.67)          | 1               |
| <b>Laboratory variables</b>            |                 |                    |                 |
| WBC(1000/ $\mu$ L)                     | 9.78(4.00)      | 8.27(5.37)         | 0.16            |
| Segment                                | 69.26(14.90)    | 63.29(14.01)       | 0.06            |
| Lymphocyte                             | 22.28(12.40)    | 28.37(12.83)       | 0.03            |
| Neutrophile lymphocyte ratio           | 5.04(4.74)      | 3.52(3.63)         | 0.08            |
| WBC $\times$ NLR                       | 56.75(65.33)    | 35.40(53.93)       | 0.09            |
| HB                                     | 14.14(1.40)     | 14.14(1.43)        | 0.99            |
| RDW                                    | 13.16(1.09)     | 13.01(0.94)        | 0.50            |
| PLT (1000/ $\mu$ L)                    | 234.62(62.01)   | 225.88(64.12)      | 0.52            |
| Prothrombin time                       | 10.77(1.03)     | 10.73(1.36)        | 0.89            |
| aPTT                                   | 27.20(1.77)     | 27.99(2.19)        | 0.08            |
| Cr (mg/dL)                             | 1.05(0.81)      | 0.94(0.24)         | 0.43            |
| BUN (mg/dL)                            | 19.03(14.46)    | 16.59(5.85)        | 0.46            |
| ALT/GPT (U/L)                          | 40.61(76.27)    | 21.05(10.64)       | 0.23            |
| AST /GOT                               | 27.27(12.07)    | 26.46(7.49)        | 0.84            |
| Creatine_kinase                        | 217.63(175.16)  | 244.62(223.13)     | 0.72            |
| myoglobin                              | 115.11(289.60)  | 40.87(23.51)       | 0.37            |
| K (mEq/L)                              | 3.82(0.44)      | 3.80(0.28)         | 0.82            |
| Na (mEq/L)                             | 138.55(2.06)    | 139.34(2.92)       | 0.15            |
| Glu (mg/ dL)                           | 117.07(52.91)   | 126.68(70.40)      | 0.64            |
| <b>Treatment modalities</b>            |                 |                    |                 |
| Antivenin, vial, Median(IQR) (FH does) | 2(2-4)          | 2(2-4)             | 0.88            |
| <b>Hospitalization</b>                 |                 |                    |                 |
| hospital admission, n *                | 30(85.71)       | 21(35)             | <0.01           |
| length of hospitalization              | 5.31(4.40)      | 1.79(2.85)         | <0.01           |

\*X<sup>2</sup> test

**Table S2.** The characteristics of the validation set of the Cobra Bite study.

|                                        | Wound infection | No wound infection | p-value |
|----------------------------------------|-----------------|--------------------|---------|
|                                        | N=11            | N=14               |         |
| <b>Demographic characteristics</b>     |                 |                    |         |
| Age                                    | 57.82(22.81)    | 55.79(17.36)       | 0.80    |
| Male                                   | 7(63.64)        | 13(92.86)          | 0.99    |
| <b>Laboratory variables</b>            |                 |                    |         |
| WBC(1000/ $\mu$ L)                     | 7.83(2.82)      | 7.84(3.22)         | 0.99    |
| Segment                                | 65.15(12.76)    | 55.79(12.77)       | 0.08    |
| Lymphocyte                             | 26.22(10.82)    | 34.65(13.27)       | 0.10    |
| Neutrophile lymphocyte ratio           | 3.58(3.29)      | 2(1.17)            | 0.16    |
| WBC $\times$ NLR                       | 33.71(43.81)    | 15.72(11.75)       | 0.21    |
| HB                                     | 14.46(2.04)     | 15.29(2.44)        | 0.38    |
| RDW                                    | 13.15(0.90)     | 12.56(1.30)        | 0.21    |
| PLT (1000/ $\mu$ L)                    | 249.18(92.94)   | 235.86(53.34)      | 0.66    |
| Prothrombin time                       | 10.59(0.71)     | 10.61(0.47)        | 0.95    |
| aPTT                                   | 27.94(3.61)     | 27.42(2.69)        | 0.69    |
| Cr (mg/dL)                             | 0.95(0.18)      | 0.89(0.21)         | 0.47    |
| BUN (mg/dL)                            | 16.54(4.87)     | 13.95(4.20)        | 0.21    |
| ALT/GPT (U/L)                          | 31.22(15.55)    | 39.29(31.92)       | 0.43    |
| AST /GOT                               | 32.50(8.17)     | 34.92(18.65)       | 0.77    |
| Creatine_kinase                        | 242.14(213.80)  | 175.67(101.21)     | 0.46    |
| myoglobin                              | 44.35(18.46)    | 45.21(45.38)       | 0.97    |
| K (mEq/L)                              | 3.77(0.26)      | 3.71(0.30)         | 0.64    |
| Na (mEq/L)                             | 140.11(2.89)    | 138.57(1.95)       | 0.14    |
| Glu (mg/ dL)                           | 141.67(70.06)   | 159.71(82.45)      | 0.68    |
| <b>Treatment modalities</b>            |                 |                    |         |
| Antivenin, vial, Median(IQR) (FN dose) | 6(2-10)         | 4(2-6)             | 0.23    |
| <b>Hospitalization</b>                 |                 |                    |         |
| hospital admission, n                  | 10(90.91)       | 7(50)              | 0.04    |
| length of hospitalization              | 6.27(4.38)      | 1.64(1.86)         | 0.01    |

**Table S3.** bacteriology culture reports and antibiotic susceptibility.

| <i>Naja atra</i> bites                                           | A<br>M<br>P | A<br>M<br>K | C<br>A<br>Z | C<br>I<br>P | S<br>C<br>F | C<br>R<br>O | C<br>X<br>M | C<br>F<br>Z | E<br>T<br>P | GEN          | L<br>V<br>X | P<br>E<br>N | S<br>A<br>M | T<br>Z<br>P | T<br>E<br>C | V<br>A<br>N |
|------------------------------------------------------------------|-------------|-------------|-------------|-------------|-------------|-------------|-------------|-------------|-------------|--------------|-------------|-------------|-------------|-------------|-------------|-------------|
| <i>Morganella morganii</i>                                       |             | S           | S           | S           | S           | S           | R           | R           | S           | S            | S           |             | R           | S           |             |             |
| <i>Proteus vulgaris</i>                                          |             | S           | S           | S           | S           | S           | R           | R           | S           | S            | S           |             | S           | S           |             |             |
| <i>E.faecalis</i>                                                | S           |             |             |             |             |             |             |             |             | S(120ug)     |             | S           |             |             | S           | S           |
| <i>Morganella morganii</i>                                       |             | S           | S           | S           | S           | S           | R           | R           | S           | S            | S           |             | S           | S           |             |             |
| <i>Proteus vulgaris</i>                                          |             | S           | S           | S           | S           | S           | R           | R           | S           | S            | S           |             | S           | S           |             |             |
| <i>Enterococcus faecalis</i>                                     | S           |             |             |             |             |             |             |             |             | S(120ug)     |             | S           |             |             | S           | S           |
| <i>Proteus vulgaris</i>                                          |             | S           | S           | S           | S           | S           | R           | R           | S           | S            | S           |             | S           | S           |             |             |
| <i>Enterococcus faecalis</i>                                     | S           |             |             |             |             |             |             |             |             | S(high dose) |             | S           |             |             | S           | S           |
| <i>Enterobacteriaceae</i>                                        |             | S           | S           | S           | S           | S           | S           | R           | S           | S            | S           |             | S           | S           |             |             |
| <i>Kleb.pneumoniae</i>                                           |             | S           | S           | S           | S           | S           | S           | S           | S           | S            | S           |             | S           | S           |             |             |
| <i>E. faecalis</i>                                               | S           |             |             |             |             |             |             |             |             | S(high dose) |             | S           |             |             | S           | S           |
| <i>Protothrops mucrosquamatus, Viridovipera stejnegeri</i> bites | A<br>M<br>P | A<br>M<br>K | C<br>A<br>Z | C<br>I<br>P | S<br>C<br>F | C<br>R<br>O | C<br>X<br>M | C<br>F<br>Z | E<br>T<br>P | GEN          | L<br>V<br>X | P<br>E<br>N | S<br>A<br>M | T<br>Z<br>P | T<br>E<br>C | V<br>A<br>N |
| <i>Enterobacter cloacae</i> complex                              |             | S           | S           | S           | S           | S           | R           | R           | S           | S            | S           |             | R           | S           |             |             |
| Coagulase(-) <i>staphylococcus</i>                               |             |             |             |             |             |             |             |             |             |              |             |             |             |             |             |             |

Abbreviations: PEN, penicillin; PIP, piperacillin; SAM, ampicillin-sulbactam; AMP, ampicillin; GEN, gentamicin; TEC, teicoplanin; VAN, vancomycin; AMK, amikacin; CIP, ciprofloxacin; CFZ, cefazolin; CXM, cefuroxime; CRO, ceftriaxone; CAZ, ceftazidime; SCF, cefoperazone-sulbactam; ETP, ertapenem; LVX, levofloxacin; TZP, piperacillin-tazobactam.

**Table S4.** Abbreviation table.

| Abbreviation     | Definition                                                             |
|------------------|------------------------------------------------------------------------|
| ALT/GPT          | alanine aminotransferase/ glutamate pyruvate transaminase              |
| aPTT             | activated partial thromboplastin time                                  |
| AST/GOT          | aspartate aminotransferase/glutamic oxaloacetic transaminase           |
| AUC              | area under the curve                                                   |
| BITE study       | Bacteriology of Infections in Taiwanese snake Envenomation study       |
| BUN              | blood urea nitrogen                                                    |
| CGMH             | Chang Gung Memorial Hospital                                           |
| CI               | confidence interval                                                    |
| Cobra BITE study | Cobra Bacteriology of Infections in Taiwanese snake Envenomation study |
| Cr               | blood creatinine                                                       |
| ED               | emergency department                                                   |
| FH               | freeze-dried hemorrhagic                                               |
| FN               | freeze-dried neurotoxic                                                |
| Glu              | blood glucose                                                          |
| Hb               | hemoglobin                                                             |

|     |                                   |
|-----|-----------------------------------|
| ICU | intensive care unit               |
| IV  | intravascular                     |
| IQR | interquartile range               |
| K   | potassium                         |
| Na  | sodium                            |
| NLR | neutrophil-lymphocyte ratio       |
| PLT | platelet count                    |
| RDW | red blood cell distribution width |
| ROC | receiver operating characteristic |
| SD  | standard deviation                |
| WBC | white blood cell count            |
